# Supplementary material for: IL-1 Receptor Antagonist Reduced Chemical-Induced Keratinocyte Apoptosis through Antagonism to IL-1α/IL-1β
Source: PubMed Central journal article supplement — Biomol Ther (Seoul). 2018 Jan 9;26(4):417–23. doi: 10.4062/biomolther.2017.167 (PMC6029682; doi:10.4062/biomolther.2017.167), 2018-01-09
Supplement: bt-26-417_suppl.pdf [file bt-26-417_suppl.pdf]

Supplementary Table 1. Up-regulated DEG (ratio of sample/control > 1.5 ) from various chemicals treated keratinocyte.

| Probe Set ID | Gene Title                            | Gene Symbol | HQ1  | HQ2  | RA1  | RA2  | SLS1  | SLS2  |
|--------------|---------------------------------------|-------------|------|------|------|------|-------|-------|
| 204751_x_at  | desmocollin 2                         | DSC2        | 1.57 | 1.96 | 2.42 | 2.18 | 3.58  | 3.45  |
| 206276_at    | lymphocyte antigen 6 complex, locus D | LY6D        | 2.15 | 2.42 | 1.76 | 1.55 | 2.35  | 10.73 |
| 212531_at    | lipocalin 2                           | LCN2        | 1.95 | 3.97 | 7.73 | 3.29 | 51.31 | 2.85  |
| 212657_s_at  | interleukin 1 receptor antagonist     | IL1RN       | 2.27 | 2.48 | 2.20 | 4.63 | 7.71  | 6.88  |
| 216243_s_at  | interleukin 1 receptor antagonist     | IL1RN       | 2.20 | 1.89 | 2.74 | 3.37 | 9.46  | 4.72  |
| 220322_at    | interleukin 1 family, member 9        | IL1F9       | 2.42 | 3.31 | 2.30 | 1.56 | 11.99 | 5.81  |
| 231033_at    | ---                                   | ---         | 1.76 | 2.64 | 2.64 | 2.08 | 8.19  | 3.54  |
| 1356_at      | ---                                   | ---         | 2.87 | 3.87 | 4.12 | 2.81 | 6.76  | 1.64  |
